# Supplementary material for: Chemical Characterization, Leishmanicidal Activity and In Vitro Cytotoxicity of the Essential Oil Extracted from Pectis brevipedunculata (Gardner) Sch.Bip. and Its Incorporation into Microemulsion Systems
Source: MDPI journal article supplement (doi:10.3390/pharmaceutics16010087), 2024-01-09
Supplement: s1 [file s1]

## Supplementary material

**Table S1.** Characterization of the microemulsion formulated using the essential oil extracted from *Pectis brevipedunculata* (ME-PB) before and after a thermal stability test.

| Samples         | Density (g/mL)        |                          | pH                       |                          | Refractive Index      |                       |
|-----------------|-----------------------|--------------------------|--------------------------|--------------------------|-----------------------|-----------------------|
|                 | Before                | After                    | Before                   | After                    | Before                | After                 |
| <b>ME-PB</b>    | 0.99 ± 0 <sup>a</sup> | 0.98 ± 0.01 <sup>a</sup> | 7.09 ± 0.23 <sup>a</sup> | 5.46 ± 0.20 <sup>b</sup> | 1.43 ± 0 <sup>a</sup> | 1.43 ± 0 <sup>a</sup> |
| <b>ME-BLANK</b> | 1.00 ± 0 <sup>a</sup> | 1.02 ± 0.02 <sup>a</sup> | 6.81 ± 0.27 <sup>a</sup> | 6.46 ± 0.30 <sup>a</sup> | 1.42 ± 0 <sup>a</sup> | 1.42 ± 0 <sup>a</sup> |

The statistical difference between the means of each sample was determined by the Anova two-way test with Tukey's comparison ( $p \leq 0.05$ ), verifying parameters before and after the thermal stability test.

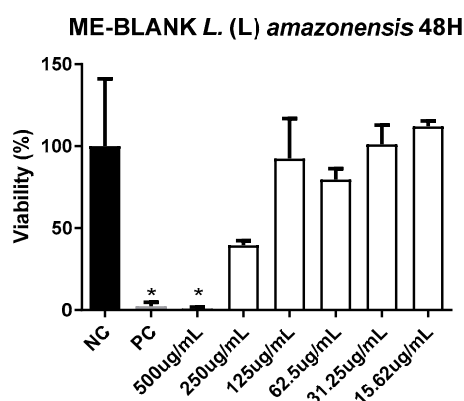

**Figure S1.** Viability of *L. (L.) amazonensis* promastigotes treated for 48 hours the microemulsion blank. NC = negative control; PC= positive control; \*Asterisks indicate statistically significant differences in relation to the negative control at  $p < 0.05$ .

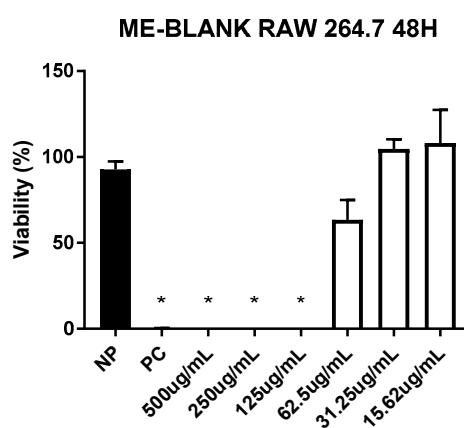

**Figure S2.** Cytotoxic activity of the microemulsion blank exerted towards the RAW 264.7 macrophage strain treated for 48 hours. NC = negative control; PC= positive control; \*Asterisks indicate statistically significant differences in relation to the negative control at  $p < 0.05$ .
